# Supplementary material for: Microbe-Derived Antioxidants Protect IPEC-1 Cells from H2O2-Induced Oxidative Stress, Inflammation and Tight Junction Protein Disruption via Activating the Nrf2 Pathway to Inhibit the ROS/NLRP3/IL-1β Signaling Pathway
Source: MDPI journal article supplement (doi:10.3390/antiox13050533), 2024-04-27
Supplement: s1 [file s1]

Table S1. Primers used in current study.

| Gene           | Forward primer (5'-3')      | Reverse primer (5'-3')        | Accession number |
|----------------|-----------------------------|-------------------------------|------------------|
| NLRP3          | CAGCACGAACCAGAATCTCA        | AGCAGCAGTGTGATGTGAGG          | NM_001256770.2   |
| ASC            | ACAACAAACCAGCACTGCAC        | CTGCCTGGTACTGCTCTTCC          | AB873106.1       |
| Caspase-1      | TTTGAAGGACAAACCCAAGG        | TGGGCTTTCTTAATGGCATC          | NM_214162.1      |
| TNF- $\alpha$  | CGCTCTTCTGCCTACTGCACTT<br>C | CTGTCCCTCGGCTTTGACATT         | JF831365.1       |
| IL-6           | CCAGGAACCCAGCTATGAAC        | CTGCACAGCCTCGACATT            | AF518322.1       |
| IL-18          | CTGCTGAACCGGAAGACAAT        | CTCAAACACGGCTTGATGTC          | AF191088.1       |
| IL-1 $\beta$   | CCAAAGAGGGACATGGAGAA        | TTATATCTTGGCGGCCTTTG          | NM_001302388.2   |
| Nrf2           | CACCACCTCAGGGTAATA          | GCGGCTTGAATGTTTGTC            | XM_021075133.1   |
| NQO1           | GTGGAAGCCGCAGACCTTGTC       | CATGGCAGCGTATGTGTAAGCAA<br>AC | NM_001159613.1   |
| HO-1           | AGGCTGAGAATGCCGAGTTC        | TGTGGTACAAGGACGCCATC          | NM_001004027.1   |
| ZO-1           | ACCCACCAAACCCACCAA          | CCATCTCTTGCCAAACTATC          | XM_013993251.1   |
| Occludin       | GCTGGAGGAAGACTGGAT          | ATCCGCAGATCCCTTAAC            | NM_001163647.2   |
| $\beta$ -actin | CTGCGGCATCCACGAAACT         | AGGGCCGTGATCTCCTTCTG          | ON164673.1       |

Table S2. siRNAs fragment sequence used in current study.

| Gene            | Forward primer (5'-3') | Reverse primer (5'-3') |
|-----------------|------------------------|------------------------|
| <i>si</i> NLRP3 | GCCUUAAGUUGUGUGAAAUTT  | AUUUCACACAACUUAAGGCTT  |
| <i>si</i> Nrf2  | GCCCAUUGAUCUCUCUGAUTT  | AUCAGAGAGAUCAAUGGGCTT  |

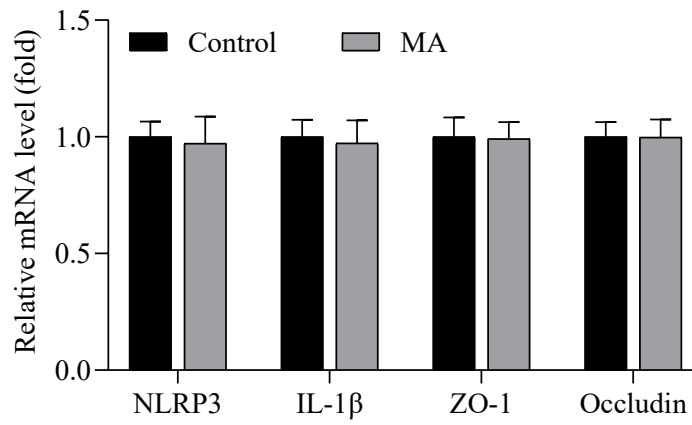

Figure S1 Effect of MA treatment on mRNA expression of NLRP3, IL-1 $\beta$ , ZO-1 and Occludin. IPEC-1 cells ( $1 \times 10^5$  cells/mL, 2 mL) were inoculated in 6-well plates, and cultured at 37°C for 24 h. Two groups were set up: Control group (cells only) and MA group (100  $\mu$ g/mL MA treatment for 12 h). Cells were collected to extract RNA for qPCR detection.
